# Supplementary material for: Targeting hepatic kisspeptin receptor ameliorates nonalcoholic fatty liver disease in a mouse model
Source: PubMed Central journal article supplement (PMC9106350; doi:10.1172/jci145889), 2022-05-16
Supplement: jci-132-145889-s131.pdf [file jci-132-145889-s131.pdf]

# 1 SUPPLEMENTAL DATA

## 2 METHODS

3

### 4 *Animals Studies*

5 All animal procedures were approved by Rutgers University according to guidelines established  
6 by the Institutional Animal Care and Use Committee. All experiments were conducted with male  
7 mice. *Kiss1r*<sup>Alb-Cre</sup> knockout mice (liver knockout: LKO) were generated by crossing a male *Alb-*  
8 *Cre*<sup>+/-</sup> to a female *Kiss1r*<sup>fl/fl</sup>. *Alb-Cre* mice were purchased from Jackson Laboratories (Stock No.  
9 003574). The *Kiss1r*<sup>fl/fl</sup> mouse was generated as previously described (99). The F1 generation was  
10 *Kiss1r*<sup>fl/+</sup>, *AlbCre*<sup>+/-</sup> or *Kiss1r*<sup>fl/+</sup>, *AlbCre*<sup>-/-</sup>. The *Kiss1r*<sup>fl/+</sup>, *AlbCre*<sup>+/-</sup> was back crossed to the  
11 *Kiss1r*<sup>fl/fl</sup> to generate *Kiss1r*<sup>fl/fl</sup>, *AlbCre*<sup>+/-</sup> (LKO) and *Kiss1r*<sup>fl/fl</sup> (littermate controls). Male LKO  
12 mice and littermate controls (6 weeks old) were placed on regular diet (RD) or high fat diet (HFD)  
13 for 20 weeks. C57BL/6J mice (5-6 weeks old) were purchased from Jackson Laboratories (Stock  
14 No. 000664). These mice were used for KPA administration studies (see below) and isolation of  
15 primary hepatocytes. For knock down of hepatic *Kiss1*, C57BL/6J albino mice (8 weeks of age)  
16 were maintained on HFD for 10 weeks and then injected with AAV8-U6-Scrambled-shRNA or  
17 AAV8-U6-mKISS1-shRNA (5x10<sup>11</sup> genome copies/mouse) purchased from Vector Biolabs);  
18 mice were maintained on HFD diet for another 4 weeks. All mice were housed in a pathogen-free  
19 barrier facility maintained on a 12-hour light/dark cycle. Male LKO, littermate controls (*Kiss1r*<sup>fl/fl</sup>)  
20 mice, and C57BL/6J mice (6 weeks old) were fed a high fat diet (HFD: 60% calories from fat,  
21 0.28% from cholesterol, 20 % calories from carbohydrate, Research Diets catalog #D12492, New  
22 Brunswick, NJ) or regular control diet (RD: 5058 Purina PicoLab Mouse 20). Mice were group-  
23 housed and provided food and water ad libitum.

24 *Administration of KP-analog*

25 KP-analog, TAK-448 (referred to as KPA) was purchased from MedChemExpress. LKO or  
26 C57BL/6J male mice (5-6 weeks of age) were maintained on a HFD or RD for 6 weeks and then  
27 fasting blood glucose was measured. Alzet mini-osmotic pump model 2004 containing KPA (0.3  
28 nmol/hr) (32) or PBS (vehicle controls) were inserted into the subcutaneous flanks of mice, as  
29 previously described (31, 32). Duration of the drug administration was five weeks, during which  
30 various metabolic tests were performed as described below, after which animals were euthanized  
31 and tissue collected for analysis. For knockdown of hepatic AMPK, C57BL/6J mice (6 weeks of  
32 age) were placed on HFD for 4 weeks then injected with AAV8-U6-M-PRKAA2-shRNA or  
33 AAV8-U6-M-scrambled-shRNA using validated sequences (Vector Biolabs,  $5 \times 10^{11}$  genome  
34 copies/mouse). Mice were kept on HFD for another three weeks before administration of KPA or  
35 Vehicle for 6 weeks, and then euthanized; off-target effects were not observed.

36 Diet Induced Animal Model of Non-Alcoholic Liver Disease (DIAMOND) mice were  
37 purchased from Sanyal Biotechnologies. This is a isogenic mouse strain derived from C57BL/6J  
38 &129S1/SvIm) that upon starting HFD and sugar water recapitulates human NAFLD (47). Male  
39 DIAMOND mice (8 weeks of age) were placed on a 'Western' high fat diet (42% calories from  
40 fat, 0.2% from cholesterol, 42.7% calories from carbohydrate, 15.2% calories from protein; Diet  
41 # TD.88137) in addition to sugar water (23.1 g/L of fructose and 18.9 g/L of glucose) for 33 weeks  
42 to induce advanced disease with Stage 3 fibrosis (47). KPA or Vehicle was then administered for  
43 6 weeks while mice were maintained on diet, prior to euthanization.

44

45

46

47 *Metabolic Tests and Metabolic Cage Assessments*

48 Blood glucose measurements using a glucometer (Bayer Contour) were performed from a small  
49 nick in the lateral tail vein. For glucose tolerance tests (GTT), mice were fasted for 12 hours and  
50 then injected intraperitoneal with D-glucose (1g/kg). For the insulin tolerance tests (ITT), mice  
51 were fasted for 6 hours and then injected intraperitoneally with insulin (0.5 U/kg; Novo Nordisk).  
52 Mice were individually housed in an 8-chamber Comprehensive Laboratory Animal Monitoring  
53 System (CLAMS) with controlled light and feeding. Carbon dioxide output, oxygen uptake,  
54 respiratory ambulatory movement, and feeding were recorded over a 4-day period.

55

56 *Quantitative Real-Time PCR (qPCR)*

57 Total RNA was extracted from mouse tissues or hepatocytes using TRIzol reagent (ThermoFisher).  
58 RNA was extracted using RNeasy (Qiagen) from human liver biopsies purchased from Research  
59 Biobank Human Liver Sekusui XenoTech (**Supplemental Table 1**). Reverse transcription was  
60 done according to manufacturer's instructions using iScript RT Supermix (Bio-Rad). Gene  
61 expression was determined using SYBR green real-time qPCR (RT-qPCR) as described previously  
62 (85-87,70) using primers (**Supplemental Table 2**).

63

64 *Immunoblot Analysis.*

65 Immunoblot assays were conducted as described previously (62, 86). Mouse liver tissue or primary  
66 hepatocytes were homogenized in RIPA lysis buffer containing proteases and phosphatases  
67 inhibitors, centrifuged at 4° C and protein expression in supernatant was analyzed by Western blot  
68 analysis. Lysates from human NAFLD/NASH liver biopsies were purchased from Research  
69 Biobank Human Liver Sekusui XenoTech. Proteins were separated using SDS-PAGE and probed

70 using the antibodies (see Supplemental Table 3). Mouse anti-GAPDH, anti-vinculin 1:1000, anti-  
71 Tubulin, or mouse anti-Lamin were used for loading controls. Protein was then incubated for 1  
72 hour in horseradish peroxidase (HRP)-conjugated rabbit 1:2500 (Cell Signaling Technology  
73 7074S) or mouse 1:2500 (Cell Signaling Technology 7076S) secondary antibody. Blots were  
74 imaged by chemiluminescence with ChemiDocTouch imaging system (Bio-Rad) using  
75 SuperSignal and West Dura Extended Duration Substrate (Thermo Scientific). Protein levels were  
76 quantified using Image Lab Software (Bio-Rad).

77

78 *Kisspeptin, Triglycerides, ALT, FFA, Glycerol, Insulin, Cholesterol, IL-1 $\alpha$ , IL-1 $\beta$ , Ketone  $\beta$ -*  
79 *Hydroxybutyrate and Hydroxyproline Measurements:* All assays were done according to  
80 manufacturer's instructions. Plasma kisspeptin levels were measured using KISS1 ELISA Kit  
81 (Antibodies online, Catalog # ABIN425747). Serum and liver triglycerides were measured using  
82 the triglyceride quantification kit (MBL international Catalog # JM-K622-500). ALT levels were  
83 measured using Liquid ALT (SGPT) Reagent (Catalog # A7526). Cholesterol levels were  
84 measured using the Cholesterol Liquid Reagent (Pointe Scientific, Catalog #C7510).  
85 Serum glycerol levels were measured using the Glycerol Assay (Sigma, Catalog #MAK117-  
86 1KT). Free fatty acids were measured using Free Fatty Acid Quantification Kit (Sigma, Catalog  
87 #MAK044). Insulin was measured using Insulin Mouse Ultra Sensitive ELISA (Crystal Chem,  
88 Catalog # 90080). IL-1 $\alpha$  was measured using Mouse IL-1 alpha/IL-1F1 Quantikine ELISA Kit  
89 (R&D Systems, Catalog # MLA00). IL-1 $\beta$  was measured using Mouse IL-1 beta/IL-1F2  
90 Quantikine ELISA Kit (R&D Systems, Catalog # MLB00C). Ketone  $\beta$ -Hydroxybutyrate was  
91 measured using  $\beta$ -Hydroxybutyrate (Ketone Body) Colorimetric Assay Kit (Cayman, Catalog #

92 700190). Hydroxyproline was measured using Hydroxyproline Assay Kit (Sigma, Catalog #  
93 MAK008).

94

95

96

#### 97 *Isolation of primary mouse hepatocytes*

98 Mouse primary hepatocytes were isolated as described (56). Briefly, 8-10 week old mice were  
99 anesthetized, livers cannulated via the hepatic portal vein and perfused with Kreb's Ringer  
100 containing EGTA followed by a second Kreb's Ringer containing CaCl<sub>2</sub> and Liberase™ Roche  
101 to dissociate the tissue. Cells were filtered and resuspended in William's Media E (Sigma) with  
102 10 % FBS (Sigma), 200 nM dexamethasone (Sigma), Penicillin-Streptomycin (10,000 U/mL) and  
103 2 mM L-glutamine (Fisher). Hepatocytes were plated at a density of 3 x 10<sup>5</sup> cells on 6-well  
104 collagen (Sigma) coated plates and left to recover overnight. Cells were serum starved for 3 h prior  
105 to experiments. Compound C was purchased from Sigma Millipore (catalog # 171261) and  
106 experiments were done as described (102). YM-254890 was purchased from Fisher (catalog  
107 #501490015) and experiments were done as previously described (67).

108

#### 109 *HepaRG cells*

110 Human HepaRG cells were purchased from Thermo Fisher Scientific and cultured  
111 according to vendor's instructions. Briefly, cells were grown to confluence in Williams E Media  
112 supplemented with 10% fetal bovine serum, Penicillin-Streptomycin (10,000 U/mL), 2 mM L-  
113 glutamine, 5 microgram/mL Insulin (Humulin R.), 50 µM hydrocortisone hemisuccinate.

114

115 *Triglyceride Synthesis*

116 Free fatty acids (150  $\mu$ M oleic and 150  $\mu$ M palmitic acid) was conjugated with 2% BSA.  
117 Cells were loaded with FFA post isolation and left to recover overnight prior to serum starvation,  
118 and then treated with KP-10 (R&D Systems) or KPA (MedChemExpress). TGs were measured  
119 using the triglyceride quantification kit as per manufacturer's instructions (MBL international  
120 Catalog # JM-K622-500).

121

122 *Immunofluorescence*

123 Immunofluorescence studies were done, as described (85). Cells were fixed in formalin,  
124 permeabilized with 0.2% Triton X, and stained as described. Cells were incubated with KISS1  
125 Antibody (EMD Millipore, 1:250) followed by goat anti Rabbit-AF555 (Invitrogen; 1:400). Nuclei  
126 were stained with Hoechst (Invitrogen; 1:10000). Images were acquired using a Zeiss LSM 700  
127 laser scanning microscope.

128

129 *Immunohistochemistry*

130

131 Mouse livers were processed for histology by the Research Pathology Services at Rutgers  
132 University. Immunohistochemical analysis of mouse and human livers was reviewed by the  
133 pathologist, Dr. He Wang. Oil Red O staining was performed on cryostat sections of the frozen  
134 liver tissues to detect neutral lipids by the Wang laboratory and quantified using Halo image  
135 analysis (algorithm area quantification V2.1.3), as described (85, 103). Immunohistochemistry on  
136 human adult liver sections was performed as described (103). Paraffin sections of healthy human  
137 liver were purchased from OriGene Technologies, Inc. (MD, USA). Paraffin sections from  
138 NASH/NAFLD patients were obtained from archived liver tissue deposited at Robert Wood

139 Johnson University Hospital Pathology lab after diagnosis was confirmed by the pathologist.  
140 Following deparaffinization and heat induced antigen retrieval, slides were incubated with the  
141 rabbit polyclonal anti-GPR54 (Abcam, ab137483; 1:1000), followed by ImmPRESS™ HRP Anti-  
142 Rabbit IgG (Peroxidase) Polymer Detection Kit (Vector Laboratories).

143

#### 144 *Oxygen Consumption Rate (OCR)*

145 OCR was measured using an Agilent Seahorse Biosciences extracellular flux analyzer (XFe24) as  
146 per the manufacturer's protocol using isolated primary mouse hepatocytes and human hepatic  
147 HepaRG cells. Briefly, cells were seeded at  $2 \times 10^4$  cells per well in XF24 plates in William's E  
148 Media and were preincubated with 100  $\mu$ M palmitate conjugated to BSA or BSA +/- KPA (3 nM)  
149 overnight at 37 °C and 5% CO<sub>2</sub>. Cells were serum starved for 1 hr prior to the assay. Basal OCR  
150 measurements were made in Seahorse XF media with 0.5 mM glucose and 0.5 mM L-carnitine,  
151 treated with KPA (3 nM) in the presence of 100  $\mu$ M palmitate or PBS. The results were analyzed  
152 using Wave software (Agilent Technologies).

153

#### 154 *Hormone Measurements*

155 Serum testosterone and glucagon levels were measured at the University of Virginia Center for  
156 Research in Reproduction Ligand Assay and Analysis Core (Charlottesville, Virginia).

157

158

#### 159 *Statistics*

160 Statistical significance between two groups was determined by unpaired two-tailed Student's t test.  
161 Unless indicated, for comparison among multiple groups, one-way analysis of variance (ANOVA)

162 followed by Dunnett's multiple comparisons test was used. A p-value <0.05 is considered to be  
163 statistically significant. Graphs were generated with GraphPad Prism version 8.3.1 (San Diego,  
164 CA).

165

166

167 *Patient blood collection and plasma kisspeptin measurement*

168 The study has been approved by the Institutional Review Board at Rutgers University and all study  
169 participants (males) provided written consent. Individuals with chronic medical conditions that  
170 may affect glucose or lipid metabolism including active malignancy, HIV infection, hepatitis B,  
171 hepatitis C, alcoholism, chronic pancreatitis, active viral/bacterial infection, severe cardiac or  
172 respiratory failure were excluded. Plasma KP immunoreactivity in healthy subjects (N=31) and  
173 patients with T2D (N=31) or with fatty liver (NAFL, N=34) or NASH (N= 25) was determined,  
174 as described (70, 100). A diagnosis of T2D was based on American Diabetes Association criteria  
175 (101). NAFL diagnoses were based on elevated AST (10-40 U/L) and ALT (9-46 U/L) levels in  
176 the absence of other causes of liver disease as well as the presence of hepatic steatosis on  
177 ultrasound. NASH diagnoses were based on histologic analysis revealing macrovesicular steatosis,  
178 lobular and portal inflammation and fibrosis. Briefly, blood (5 mL) was collected in BD Vacutainer  
179 K2 EDTA tubes (VWR International) from subjects recruited from Endocrinology (Dr. Ankit  
180 Shah's) and Hepatology (Dr. Vinod Rustgi's) clinics at Robert Wood Johnson Medical School in  
181 New Brunswick, NJ. Subjects were also recruited from Imperial College London/Imperial College  
182 Healthcare NHS Trust Metabolic and Hepatology clinics (Dr. Chioma Izzi-Engbeaya, Dr. Michael  
183 Yee, Dr. Pinelopi Manousou and Prof. Waljit Dhillon). This was reviewed and approved by the  
184 West London Research Ethics Committee (12/LO/0507) and was performed in accordance with



185 the Declaration of Helsinki. Blood was centrifuged for 10 min at 855 g and plasma was frozen  
186 immediately for storage. Plasma KP immunoreactivity was measured using an in-house  
187 radioimmunoassay in the Dhillio laboratory as described (100).

188

189

Supplemental Table 1: Clinical profile of commercially available male liver biopsies obtained from Research Biobank Human Liver Sekusui XenoTech

| Diagnosis                  | Healthy (n=5)              | NAFL/NASH (n=7)            |
|----------------------------|----------------------------|----------------------------|
| Age (years)                | 51.6 ± 9                   | 46.1 ± 5.5                 |
| BMI                        | 25.6 ± 4.3                 | 42.9 ± 11.4*               |
| Macro fat %<br>(Steatosis) | 0                          | 52.7 ± 26.6                |
| Diabetes                   | 0/5                        | 2/7                        |
| Steatohepatitis            | 0/5                        | 7/7                        |
| Fibrosis                   | 0/5                        | 2/7                        |
| Alcohol<br>Consumption     | 4/5 None<br>1/5 Occasional | 3/7 None<br>4/7 Occasional |
| Hepatitis B or C           | Negative                   | Negative                   |

\*: p<0.05 significance compared to healthy

Supplemental Table 2: Primers

| <b>Name</b>    | <b>Forward</b>            | <b>Reverse</b>            |
|----------------|---------------------------|---------------------------|
| <i>Acaca</i>   | ATGGGCGGAATGGTCTCTTTC     | TGGGGACCTTGTCTTCATCAT     |
| <i>Acta2</i>   | ACTGGGACGACATGGAAAAG      | G TTCAGTGGTGCCTCTGTCA     |
| <i>Aox</i>     | TGTCATTCTACCAACTGTC       | CCATCTTCTCAACTAACACTC     |
| <i>Cd36</i>    | GATGACGTGGCAAAGAACAG      | TCCTCGGGGTCCTGAGTTAT      |
| <i>Coll1a1</i> | GAGAGAGCATGACCGATGGATT    | TGTAGGCTACGCTGTTCTTGCA    |
| <i>Coll1a2</i> | GCAGGGTTCCAACGATGTTG      | GCAGCCATCGACTAGGACAGA     |
| <i>Col3a1</i>  | TCCCCTGGAATCTGTGAATC      | TGAGTCGAATTGGGGAGAAT      |
| <i>Col4a1</i>  | TTCGCCTCCAGGAACGACTA      | AAACCGCACACCTGCTAATG      |
| <i>Cpt1a</i>   | AAACCCACCAGGCTACAGTG      | TCCTTGTAATGTGCGAGCTG      |
| <i>Cpt2</i>    | AAGCCTCTCTTGAATGACAGC     | CCAATGCCGTTCTCAAAATC      |
| <i>Cyp4a10</i> | TTCCTGATGGACGCTCTTTA      | GCAAACCTGGAAGGGTCAAAC     |
| <i>Cyp4a14</i> | CAAGACCCTCCAGCATTTC       | GAGCTCCTTGTCTTCAGATGGT    |
| <i>Fasn</i>    | GGAGGTGGTGATAGCCGGTAT     | TGGGTAATCCATAGAGCCCAG     |
| <i>Gk</i>      | ATCCGCTGGCTAAGAGACAACC    | TGCACTGGGCTCCCAATAAGG     |
| <i>Il1a</i>    | CGCTTGAGTCGGCAAAGAAA      | TGATACTGTCACCCGGCTCT      |
| <i>Il1b</i>    | CAACCAACAAGTGATATTCTCCATG | GATCCACACTCTCCAGCTGCA     |
| <i>Ip10</i>    | AAGTGCTGCCGTCATTTTCT      | GTGGCAATGATCTCAACACG      |
| <i>Kiss1</i>   | AGCTGCTGCTTCTCCTCTGT      | GCATACCGCGATTCTTTTT       |
| <i>Kiss1r</i>  | CTGCCACAGACGTCACTTTC      | ACATACCAGCGGTCCACACT      |
| <i>Lfabp</i>   | GCAGAGCCAGGAGAACTTTGAG    | TTTGATTTTCTTCCCTTCATGCA   |
| <i>Mcp1</i>    | AATGAGTAGCAGCAGGTGAGTG    | GAAGCCAGCTCTCTCTTCCTC     |
| <i>Mip2</i>    | CCCAGACAGAAGTCATAGCCAC    | GCCTTGCCTTTGTTCAGTATC     |
| <i>Mmp2</i>    | TCTGCGATGAGCTTAGGGAAAC    | GACATACATCTTTGCAGGAGACAAG |
| <i>Mmp13</i>   | AGAAGTGTGACCCAGCCCTA      | GCGCAAGAAGAATCTGTCTTT     |
| <i>Opn</i>     | GACAACAACGGAAAGGGCAG      | GATCGGCACTCTCCTGGCT       |
| <i>Pgcl1a</i>  | TATGGAGTGACATAGAGTGTGCT   | CCACTTCAATCCACCCAGAAAG    |
| <i>Pparg</i>   | CGACATGAGTTCCTTTATGATGGG  | TGTGATCTCTTGACGGCTT       |
| <i>Prkaa2</i>  | TCCAGCACAGCTGAGAACCA      | GGGATGCCGAGGACAAAGT       |
| <i>Timp1</i>   | CCTTGCAAACCTGGAGAGTGACA   | AGGCAAAGTGATCGCTCTGGT     |
| <i>Tnfa</i>    | CGTCAGCCGATTTGCTATCT      | CGGACTCCGCAAAGTCTAAG      |
| <i>Tgfb</i>    | TGACGTCACTGGAGTTGTACGG    | GGTTCATGTCATGGATGGTGC     |
| <i>Rpl13a</i>  | GCTGCTCTCAAGGTTGTTCG      | CCTTTTCCTTCCGTTTCTCC      |

*Srebpl1c*, *Aqp3*, *Aqp9*, *Gpat2*, *Agpat2*, *Dgat1*, *Dgat2*, *Mogat1*, *Gpam*, *Ucp1*, *Ucp2* and mouse and human TBP primers were purchased from BioRad.

Supplemental Table 3: Antibodies

| Antibody Name   | Source | Company           | Catalog #  |
|-----------------|--------|-------------------|------------|
| ACC             | Rabbit | CST               | 4190       |
| AMPK            | Rabbit | CST               | 2532       |
| AMPKa1          | Rabbit | CST               | 5832       |
| AMPKa2          | Rabbit | Abcam             | 3760       |
| ATGL            | Rabbit | CST               | 2138       |
| COL1A1          | Rabbit | CST               | 91144      |
| COX1            | Rabbit | CST               | 62101      |
| DGAT1           | Rabbit | Novus Biologicals | 41487      |
| FAS             | Rabbit | CST               | 3180       |
| GAPDH           | Mouse  | Genetex           | 627408     |
| GK              | Rabbit | Abcam             | 126599     |
| GLYCEROL KINASE | Rabbit | Abcam             | 126599     |
| GPAT1           | Rabbit | Novus Biologicals | 76907      |
| HSL             | Rabbit | CST               | 4107       |
| IL1B            | mouse  | CST               | 12242S     |
| KISS1           | Rabbit | Proteintech       | 18375-1-AP |
| KISS1R          | Rabbit | Abcam             | 137483     |
| MMP13           | rabbit | Thermo fisher     | TA506688   |
| MMP2            | Rabbit | Abcam             | 228402     |
| MMP9            | Rabbit | Abcam             | 228402     |
| MOGAT1          | Rabbit | Abcam             | 81177      |
| NFKB            | Rabbit | CST               | 8242       |
| pACC (ser79)    | Rabbit | CST               | 11818      |
| pAMPK (Thr172)  | Rabbit | CST               | 2535       |
| pATGL           | Rabbit | Abcam             | 135093     |
| pHSL            | Rabbit | CST               | 45804      |
| pNFKB           | Rabbit | CST               | 3033       |
| PPARG           | Rabbit | CST               | 2443       |
| PPARG           | Mouse  | Abcam             | 133625     |
| pPPARG (Ser112) | Rabbit | Invitrogen        | PA5-36763  |
| SMA             | Rabbit | CST               | 19245S     |
| TGFB            | Mouse  | R&D Systems       | MAB1835    |
| TUBULIN         | Mouse  | CST               | 86298S     |
| VDAC            | Rabbit | CST               | 4661       |
| VINCULIN        | Mouse  | Bio Rad           | MCA465GA   |

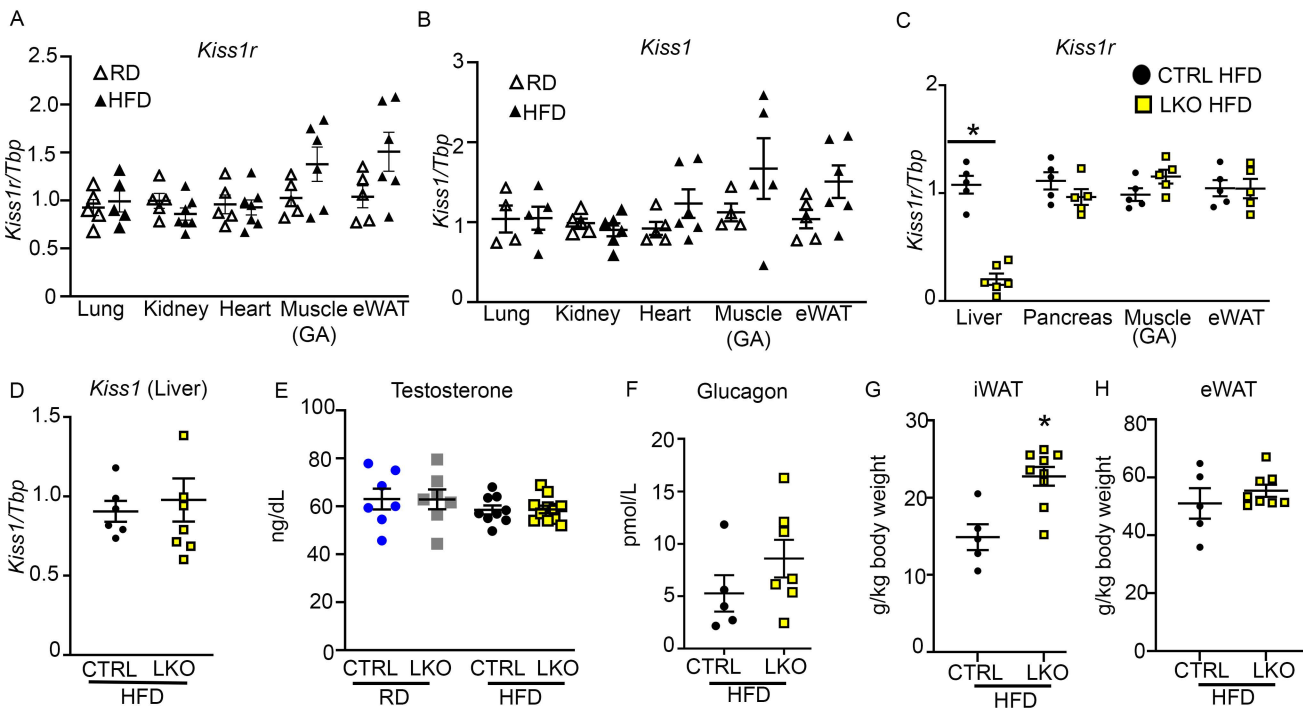

**Supplemental Figure 1.** (A-D) Relative mRNA expression of indicated genes by RT-qPCR; GA muscle: gastrocnemius muscle. (E) Serum testosterone levels. (F) Plasma glucagon levels. Weight of (G) inguinal white adipose tissue (iWAT) and (H) epididymal white adipose tissue (eWAT). Mean +/- SEM shown. Student's unpaired t-test or one-way ANOVA followed by Dunnett's post-hoc test; \*p<0.05 versus respective controls.

**GUZMAN ET AL SUPPLEMENTAL FIGURE 2**
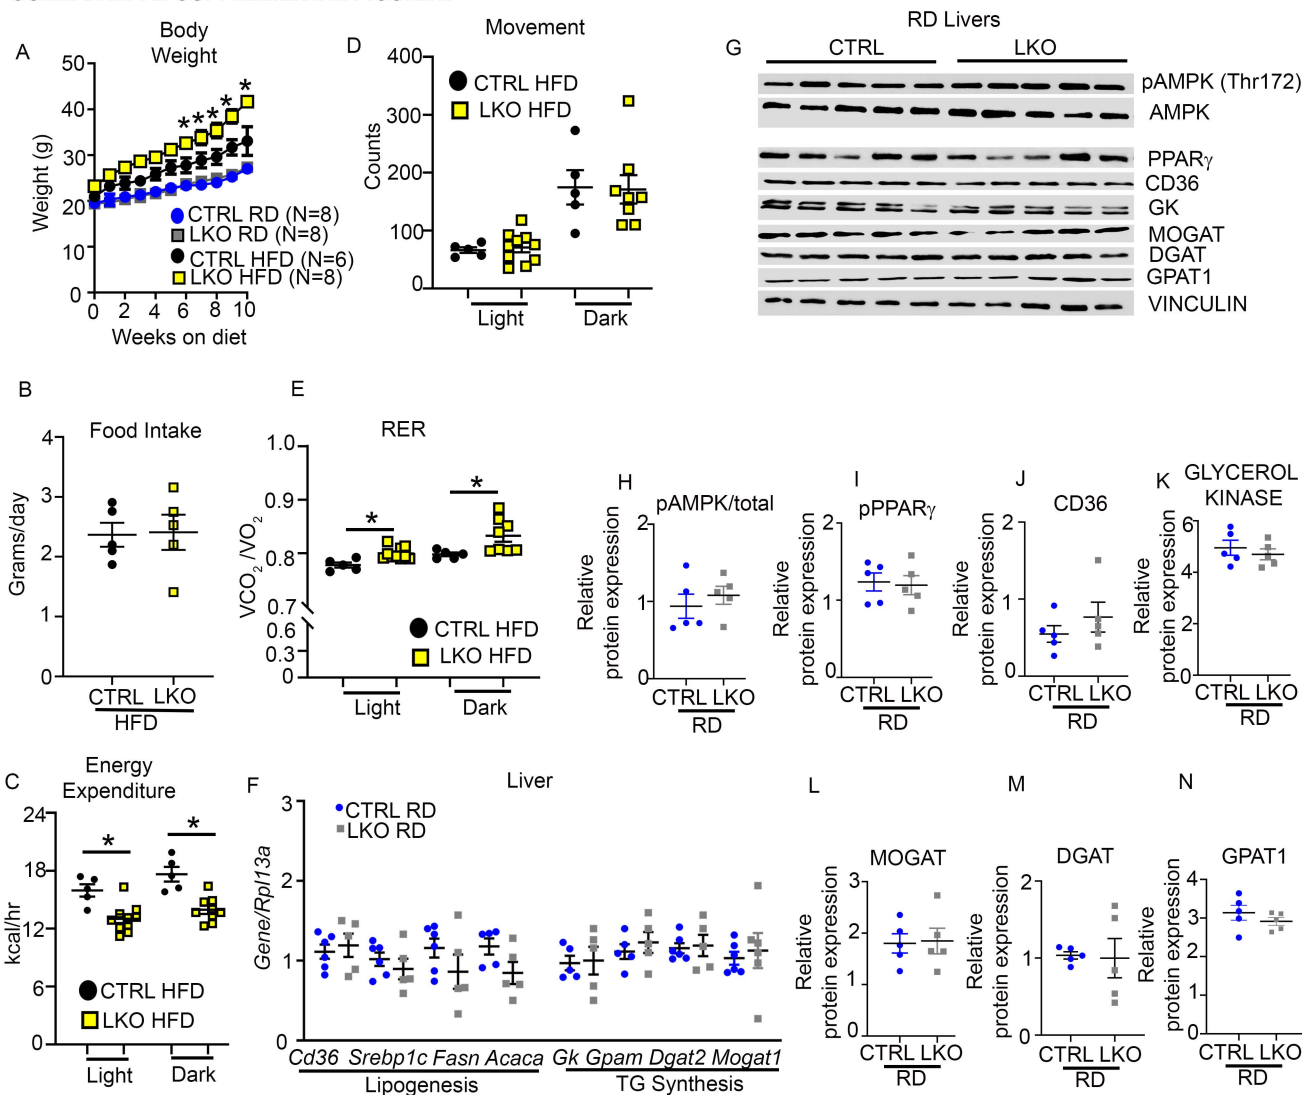

**Supplemental Figure 2.** (A) Body weight of male LKO and littermate controls (CTRL) during the first 10 weeks on diet. (B) Daily food intake (averaged over 4 days), assessed by CLAMS. CLAMS analysis displaying (C) energy expenditure, (D) ambulatory activity, (E) respiratory exchange ratio (RER). (F) Expression of indicated genes by RT-qPCR analysis in LKO and CTRL mice maintained on regular diet (RD) for 20 weeks. (G) Representative Western blots and (H-N) densitometric analyses of blots in (G). Mean  $\pm$  SEM shown. Student's unpaired t-test or one-way ANOVA followed by Dunnett's post-hoc test; \* $p < 0.05$  versus respective controls.

**GUZMAN ET AL SUPPLEMENTAL FIGURE 3**

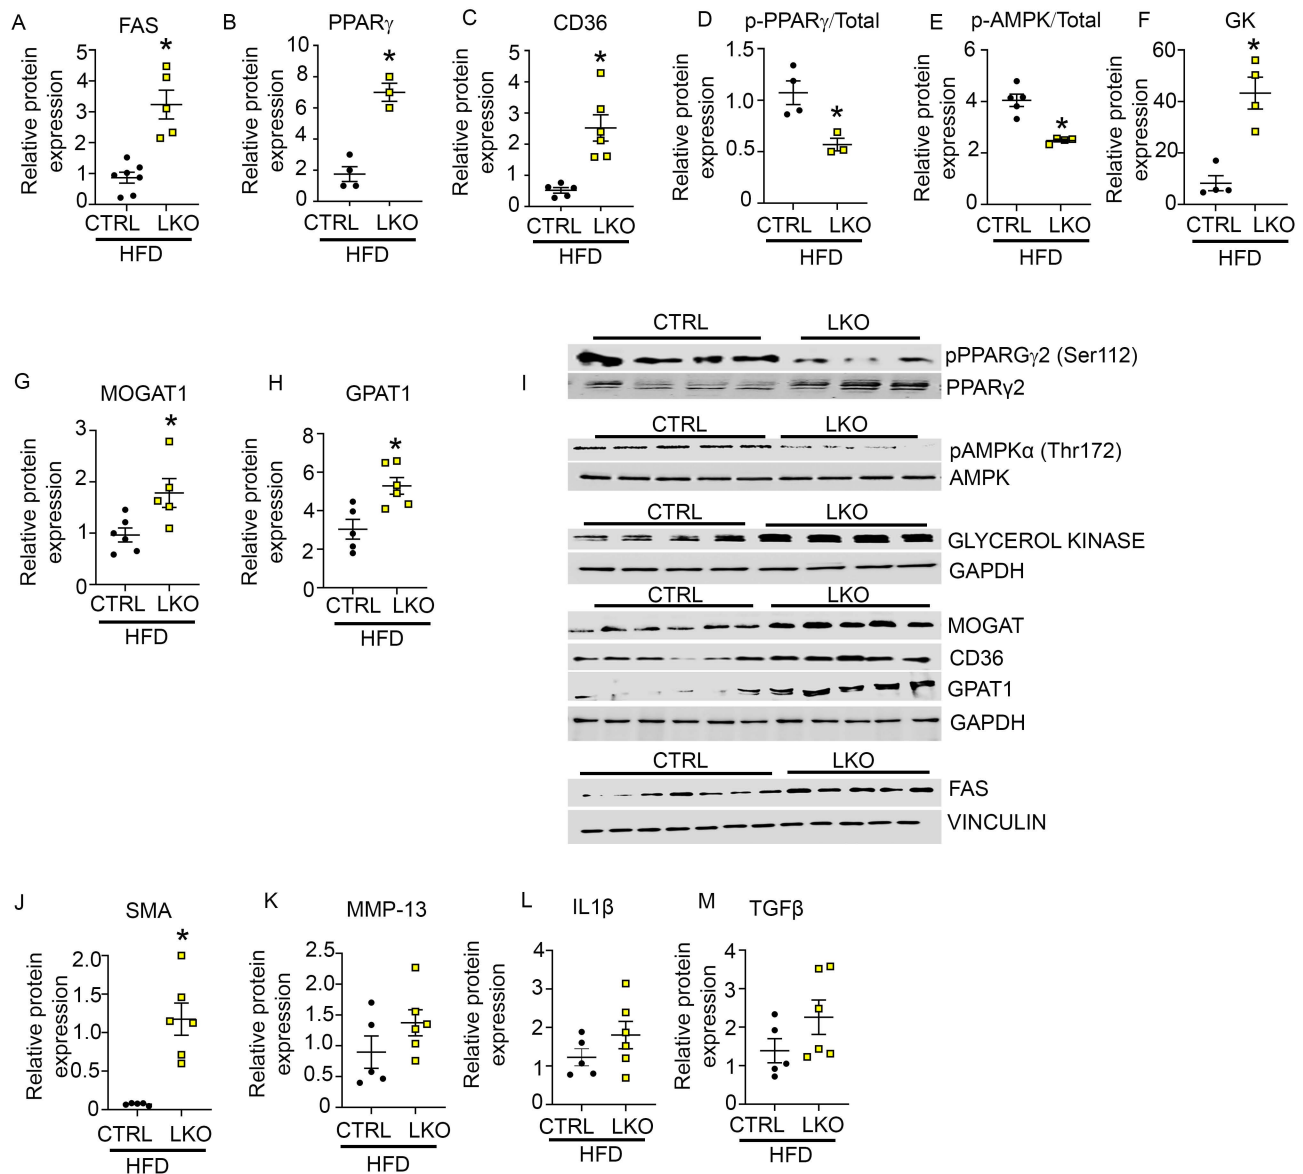

**Supplemental Figure 3.** Densitometric analyses of blots in Figure 2B (A-H). Full blots from Figure 2B shown in (I). Densitometric analyses of blots in Figure 3J (J-M). Mean  $\pm$  SEM shown. Student's unpaired t-test \* $p < 0.05$  versus respective controls.

**GUZMAN ET AL SUPPLEMENTARY FIGURE 4**

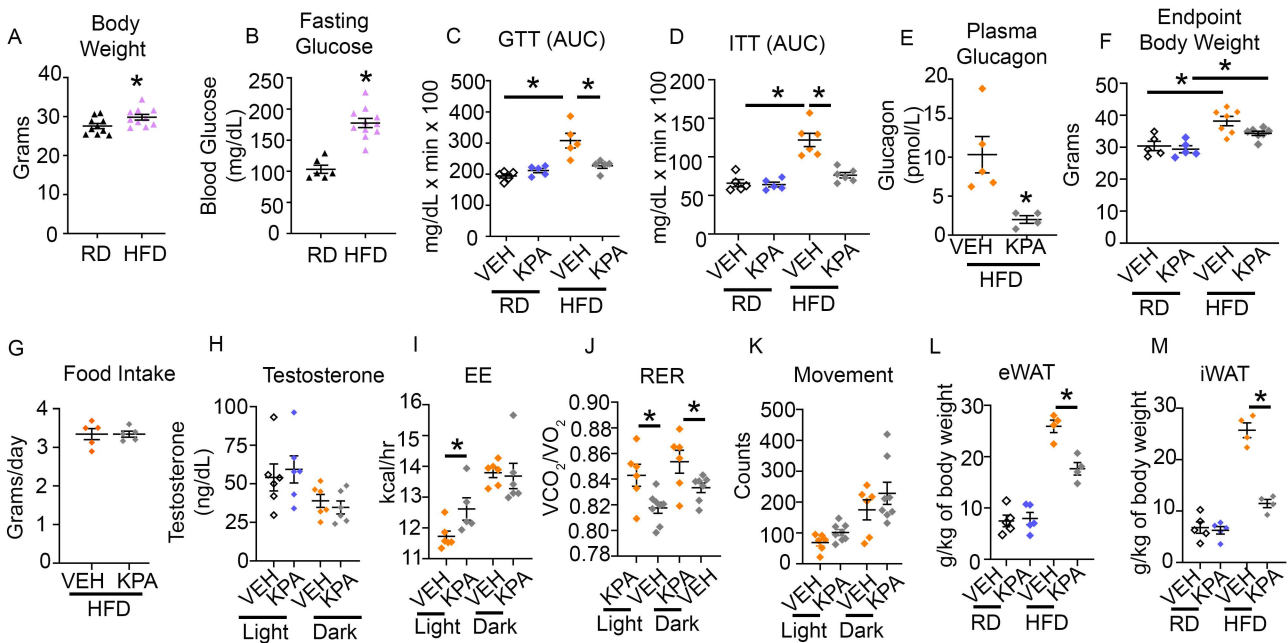

**Supplemental Figure 4.** C57BL/6J male mice were placed on RD or HFD for 6 weeks. (A) Body weight and (B) fasting glucose levels prior to treatment with Vehicle (VEH, PBS) or KPA. (C, D) Area under the curve (AUC) of blood glucose levels shown in GTT and ITT, respectively shown in Figure 4B, C. (E) Plasma glucagon levels, 5 weeks post treatment. (F) Endpoint body weight (11 weeks on diet). (G) Daily food intake measured by CLAMS. (H) Serum testosterone levels, 5 weeks post treatment. CLAMS analyses showing (I) energy expenditure (EE) (J) respiratory exchange ratio (RER) and (K) ambulatory activity of mice. Weight of white adipose tissue (L) epididymal (eWAT) and (M) inguinal (iWAT). Mean +/- SEM shown. Student's unpaired t-test \* $p < 0.05$  versus respective controls.



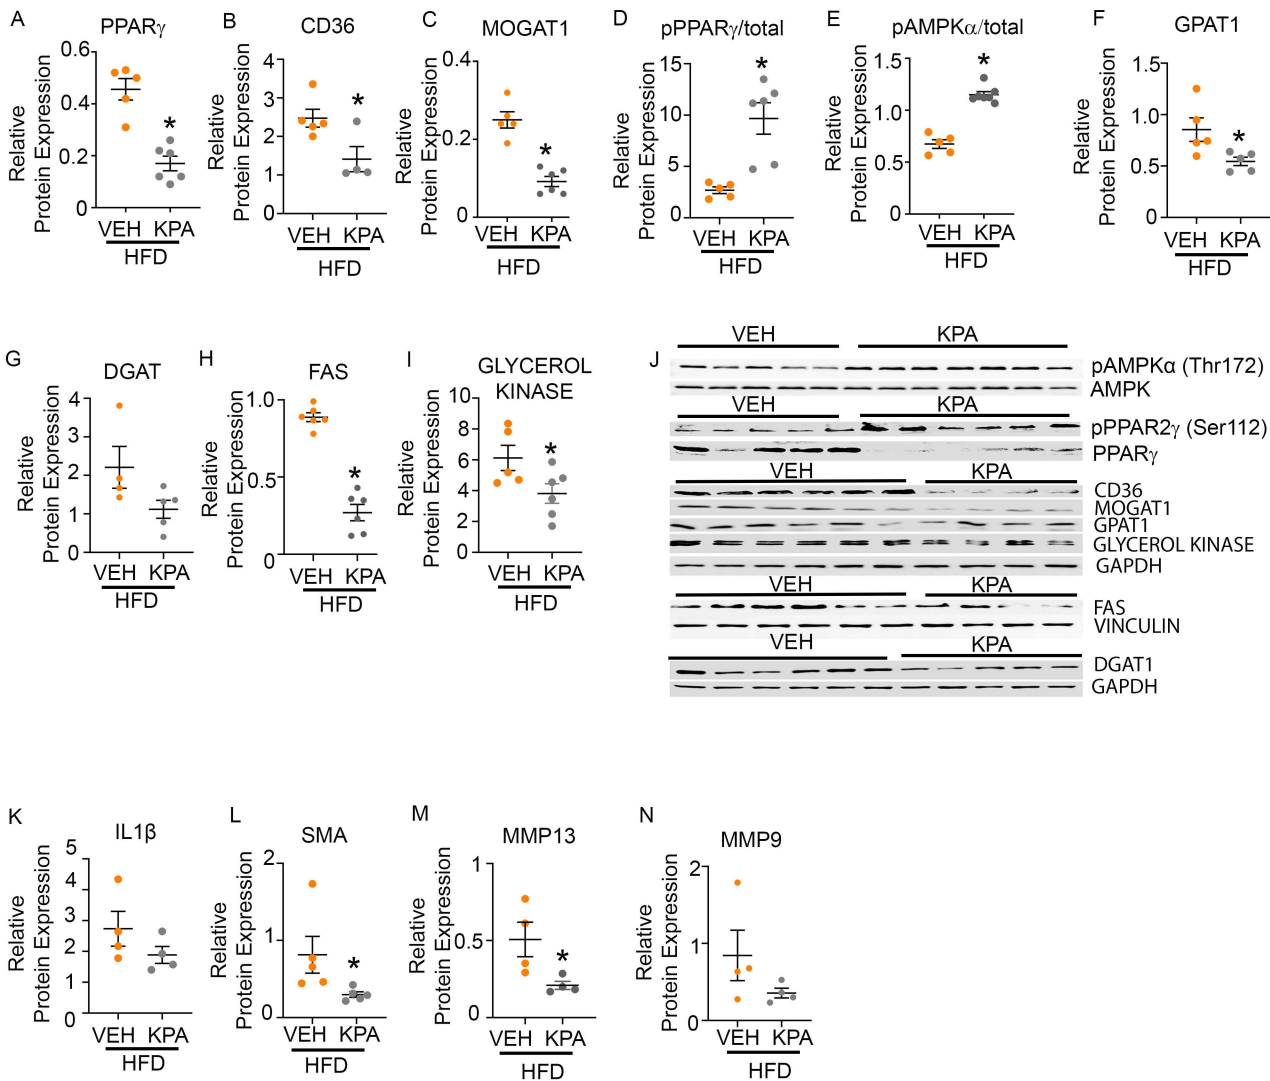

**Supplemental Figure 5.** (A-I) Densitometric analyses of blots in Figure 5A and (J) showing full blots (Figure 5A).

(K-N) Densitometric analyses of blots in Figure 5G. Mean  $\pm$  SEM shown. Student's unpaired t-test \* $p < 0.05$  versus respective controls.

**GUZMAN ET AL SUPPLEMENTARY FIGURE 6**

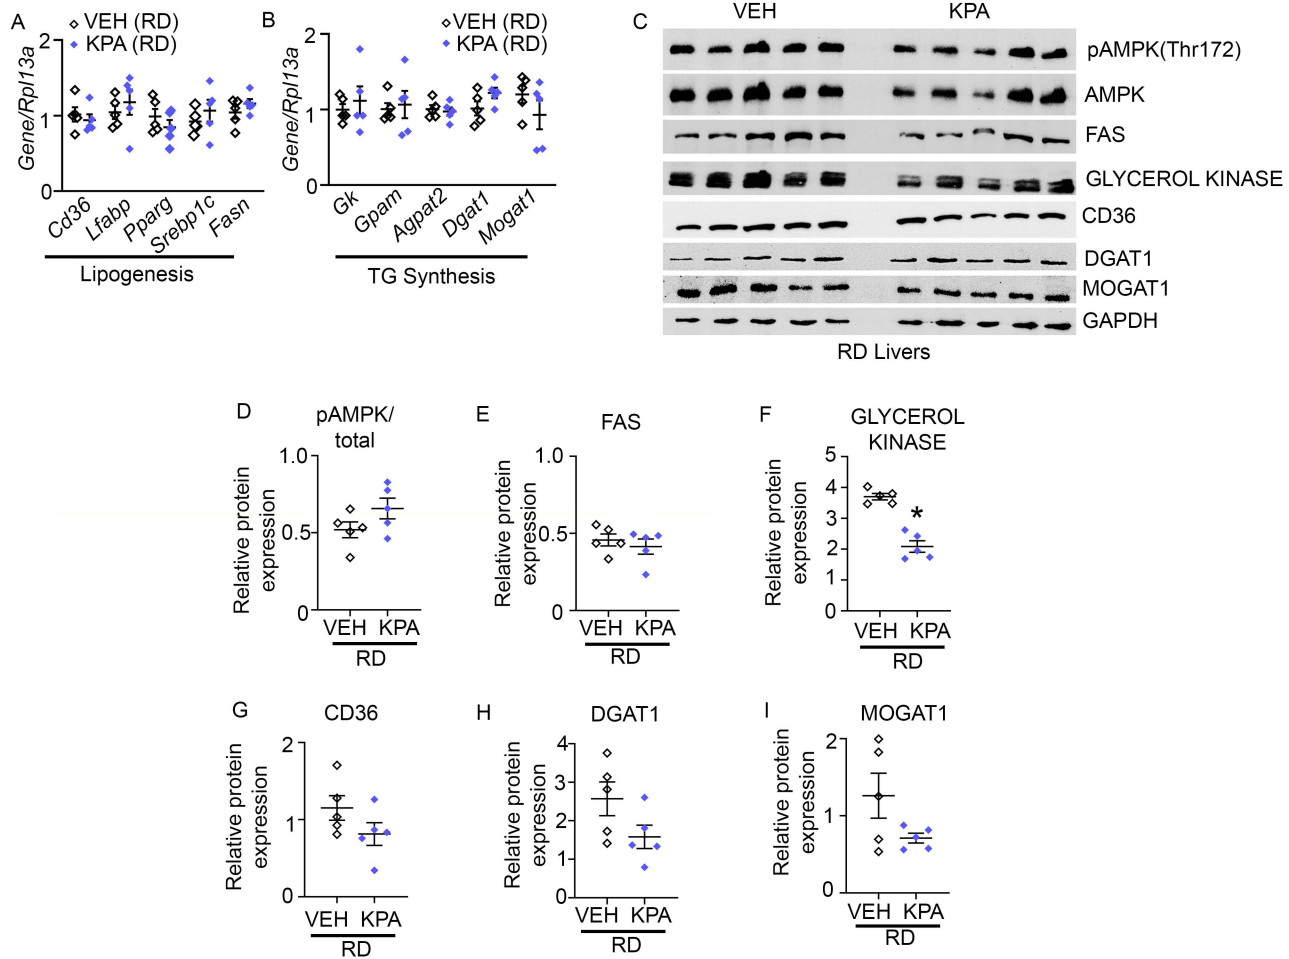

**Supplemental Figure 6.** C57BL/6J male mice were placed on RD for 6 weeks then VEH or KPA was administered for 5 weeks while maintained on diet. (A, B). Relative mRNA expression of indicated hepatic genes by RT-qPCR. (C) Representative Western blot analysis of indicated proteins and densitometric analyses of blots shown in (D-I). Mean +/- SEM shown. Student's unpaired t-test \*p<0.05 versus respective controls.

**GUZMAN ET AL SUPPLEMENTARY FIGURE 7**

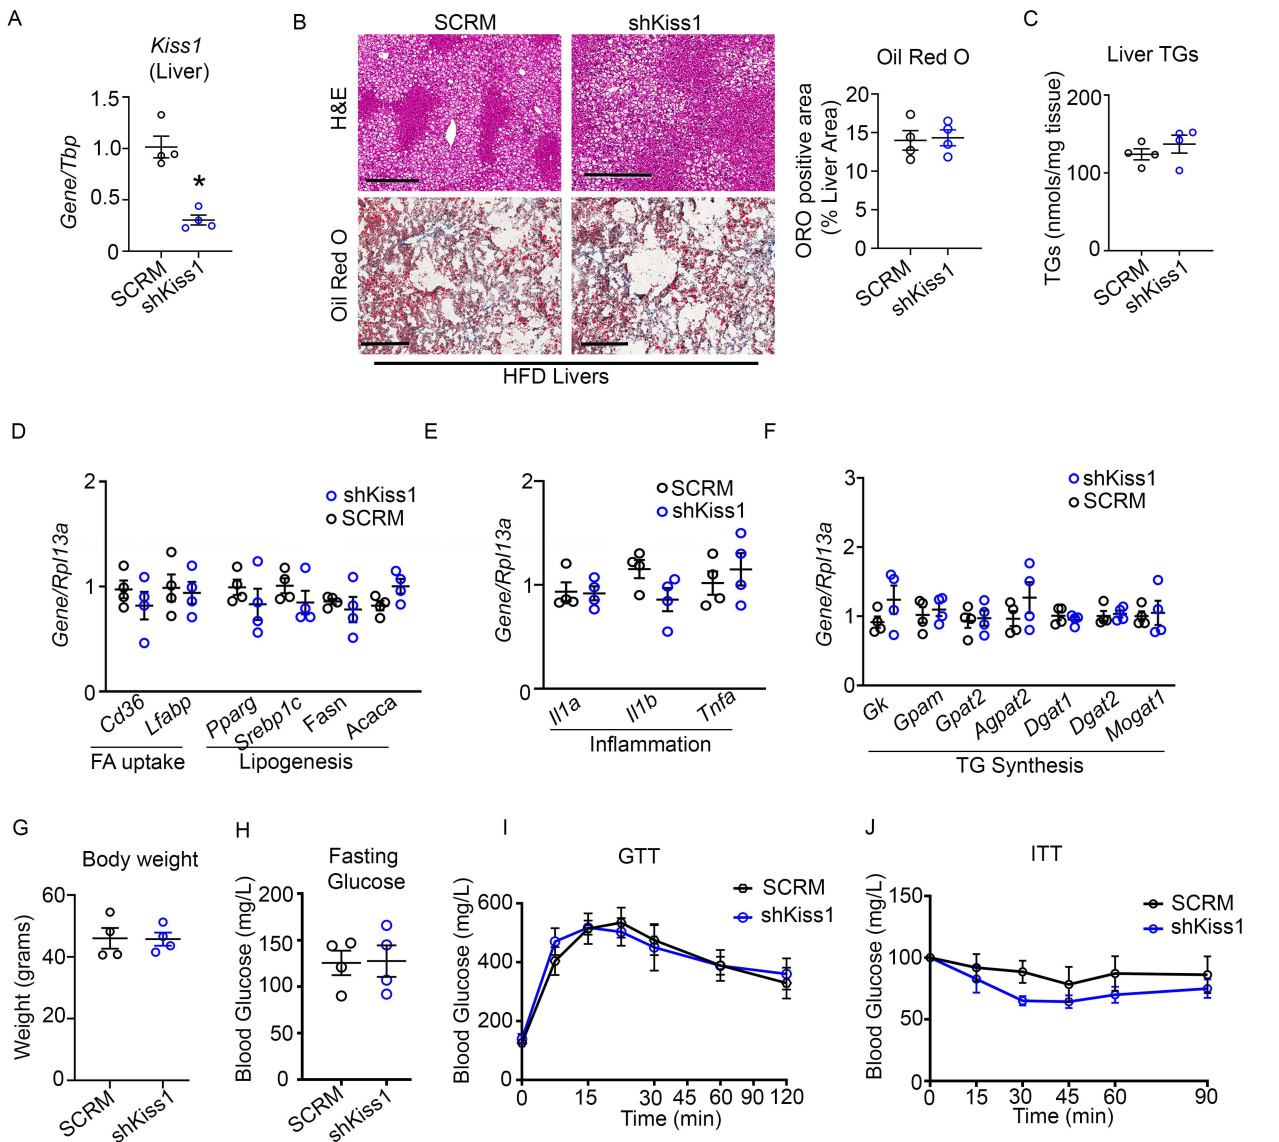

**Supplemental Figure 7.** C57BL/6J mice were placed on HFD for 10 weeks then injected with AAV8-U6-scrmb-shRNA (SCRM) or AAV8-U6-mKiss1-shRNA (shKiss1). (A) Hepatic *Kiss1* mRNA levels showing knockdown. (B) Representative histology of liver sections Oil Red O staining quantification shown in graph. Scale bar: 300  $\mu$ m (C) Liver triglycerides (TGs). (D-F) Relative mRNA expression of indicated hepatic genes. (G) Endpoint bodyweight. (H) Fasting blood glucose levels. Blood glucose levels during (I) GTT and (J) ITT; (N=4 for SCRM or shKiss1 cohorts). Mean  $\pm$  SEM shown. Student's unpaired t-test or one-way ANOVA followed by Dunnett's post-hoc test. \* $p < 0.05$  versus respective controls.

**GUZMAN ET AL SUPPLEMENTARY FIGURE 8**

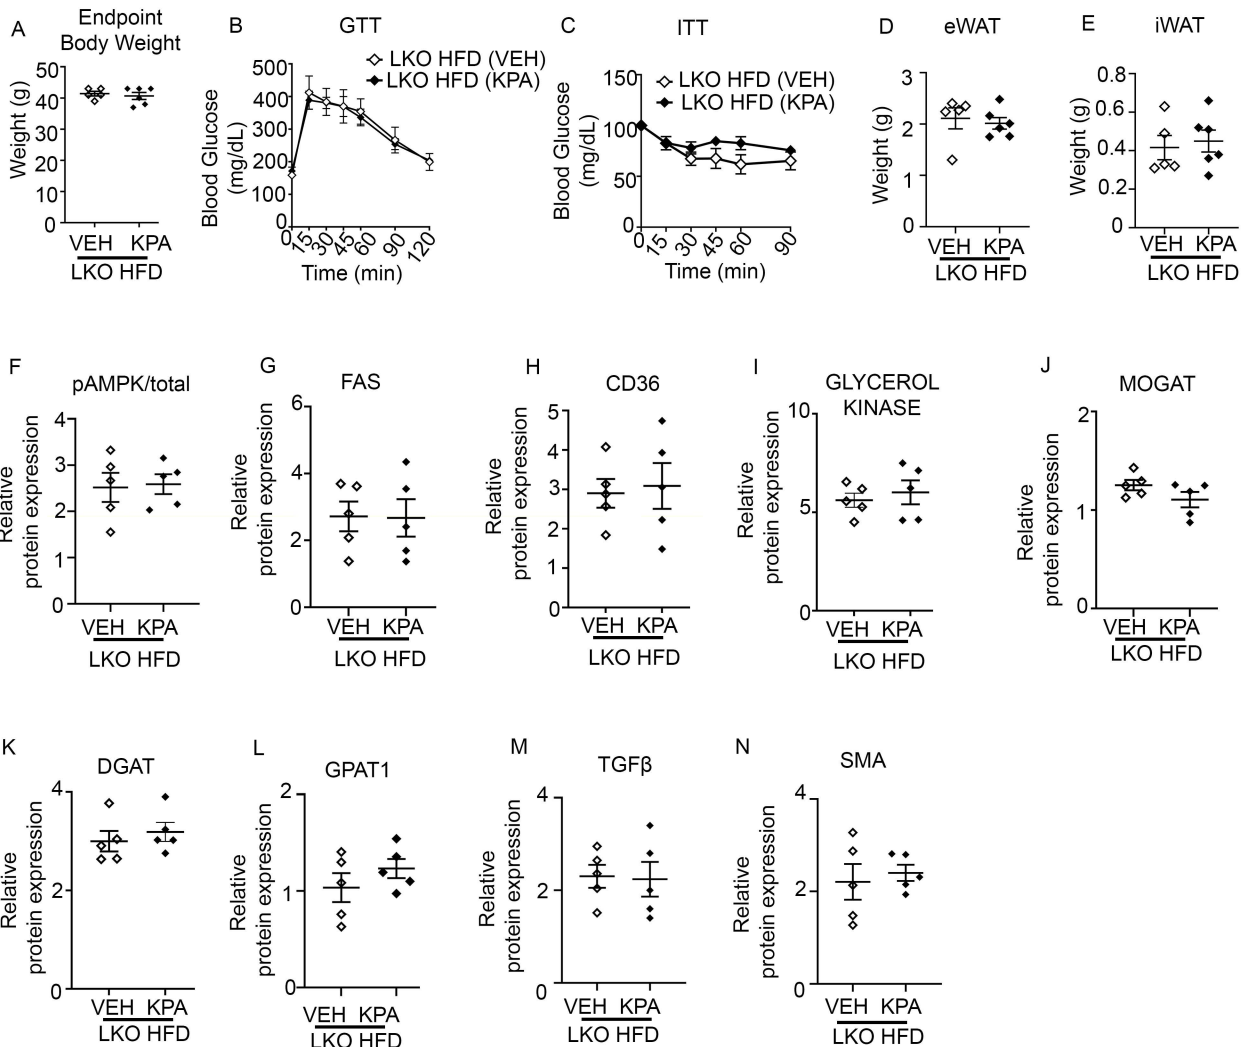

**Supplemental Figure 8.** Hepatic *Kiss1r* knock-out mice were placed on HFD for 6 weeks, then treated with Vehicle (VEH: PBS) or KPA. Mice were maintained on HFD for another 6 weeks. (A) Endpoint body weights of mice on HFD for 12 weeks (6 weeks after the start of treatment). Blood glucose levels during (B) GTT and (C) ITT. [N=5 LKO HFD (VEH); N=6 LKO HFD (KPA)]. Weight of (D) eWAT and (E) iWAT. (F-N) Densitometric analyses of Western blots shown in Figure 6J. Mean +/- SEM shown. Student's unpaired t-test or one-way ANOVA followed by Dunnett's post-hoc test. \*p<0.05 versus respective controls.

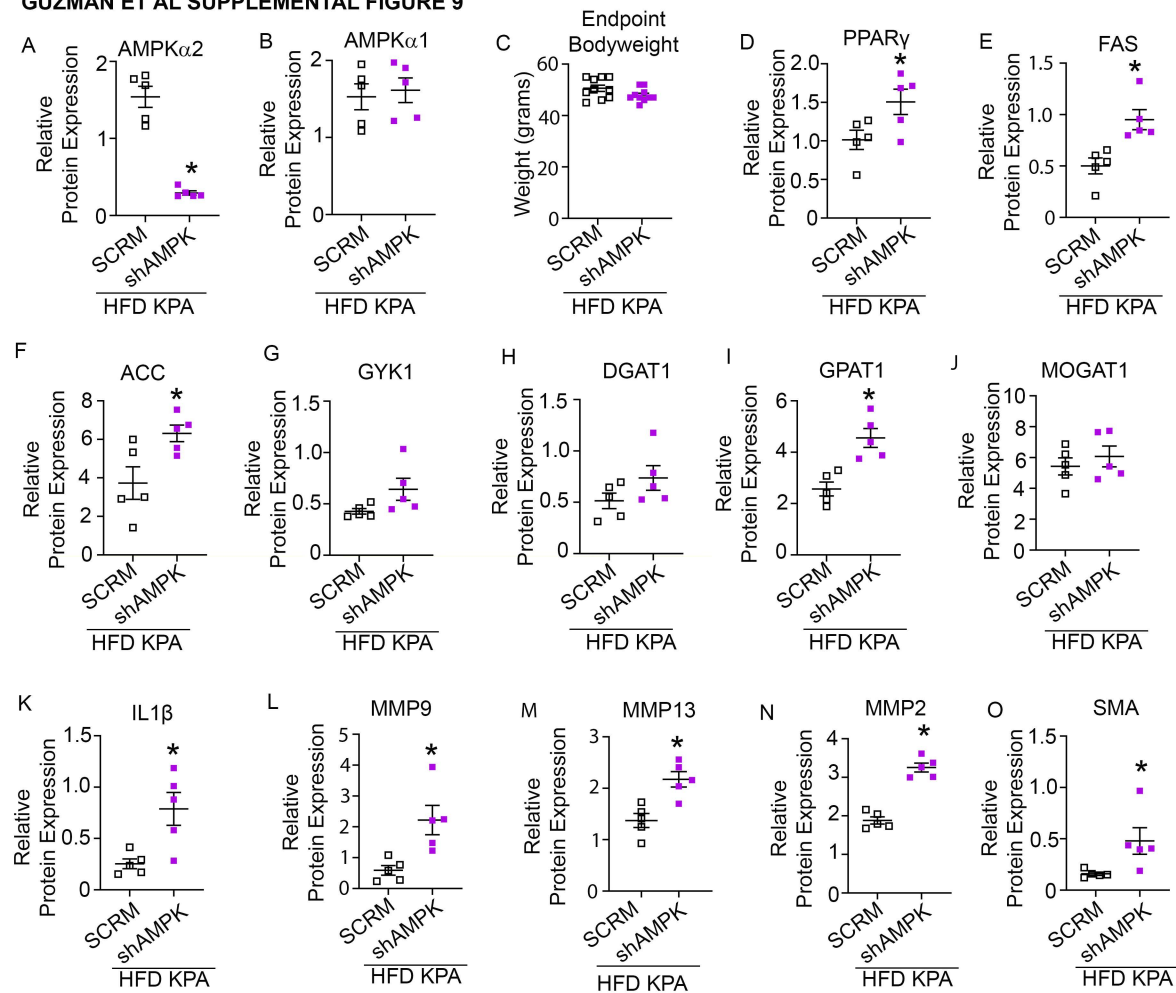

**Supplemental Figure 9.** Densitometric analyses of blots in Figure 7B (A, B), Figure 7I (D-J) and Figure 7M (K-O) showing the expression of the indicated proteins. (C) Endpoint bodyweight of SCRM and shAMPK mice on HFD for 13 weeks (6 weeks after start of treatment). Mean +/- shown. Student's unpaired t-test \* $p < 0.05$  versus respective controls.

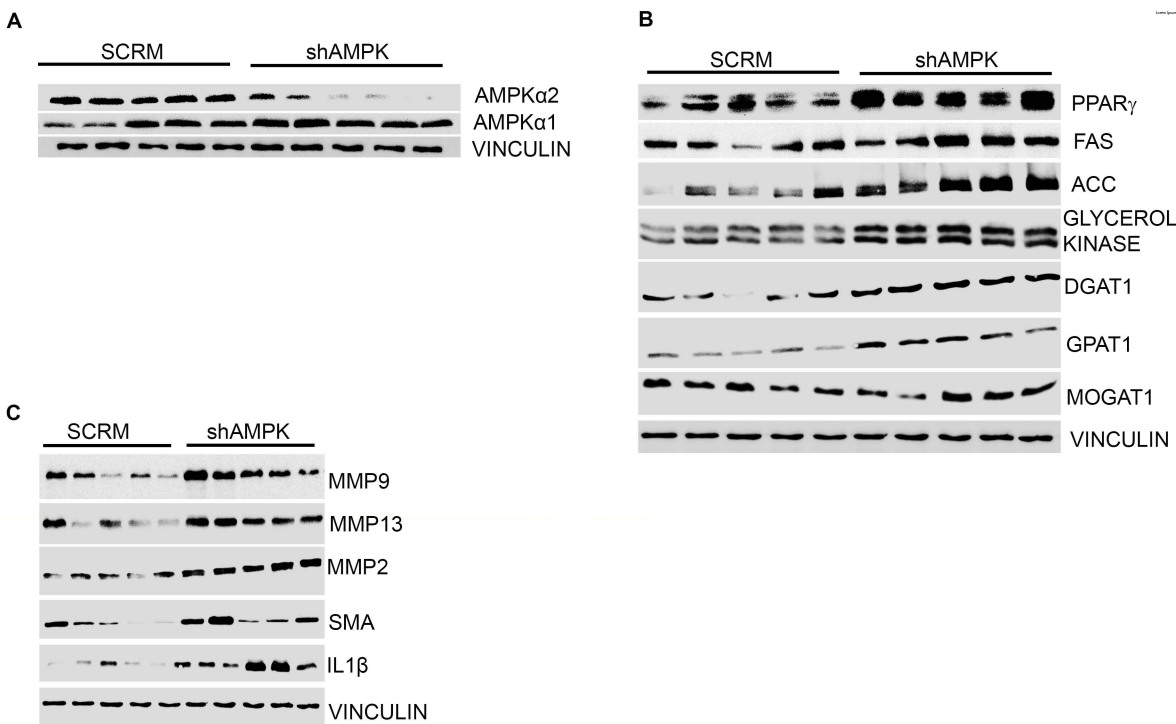

**Supplemental Figure 10.** Full blots from (A) Figure 7B, (B) Figure 7I, and (C) Figure 7M.

**SUPPLEMENTAL FIGURE 11**

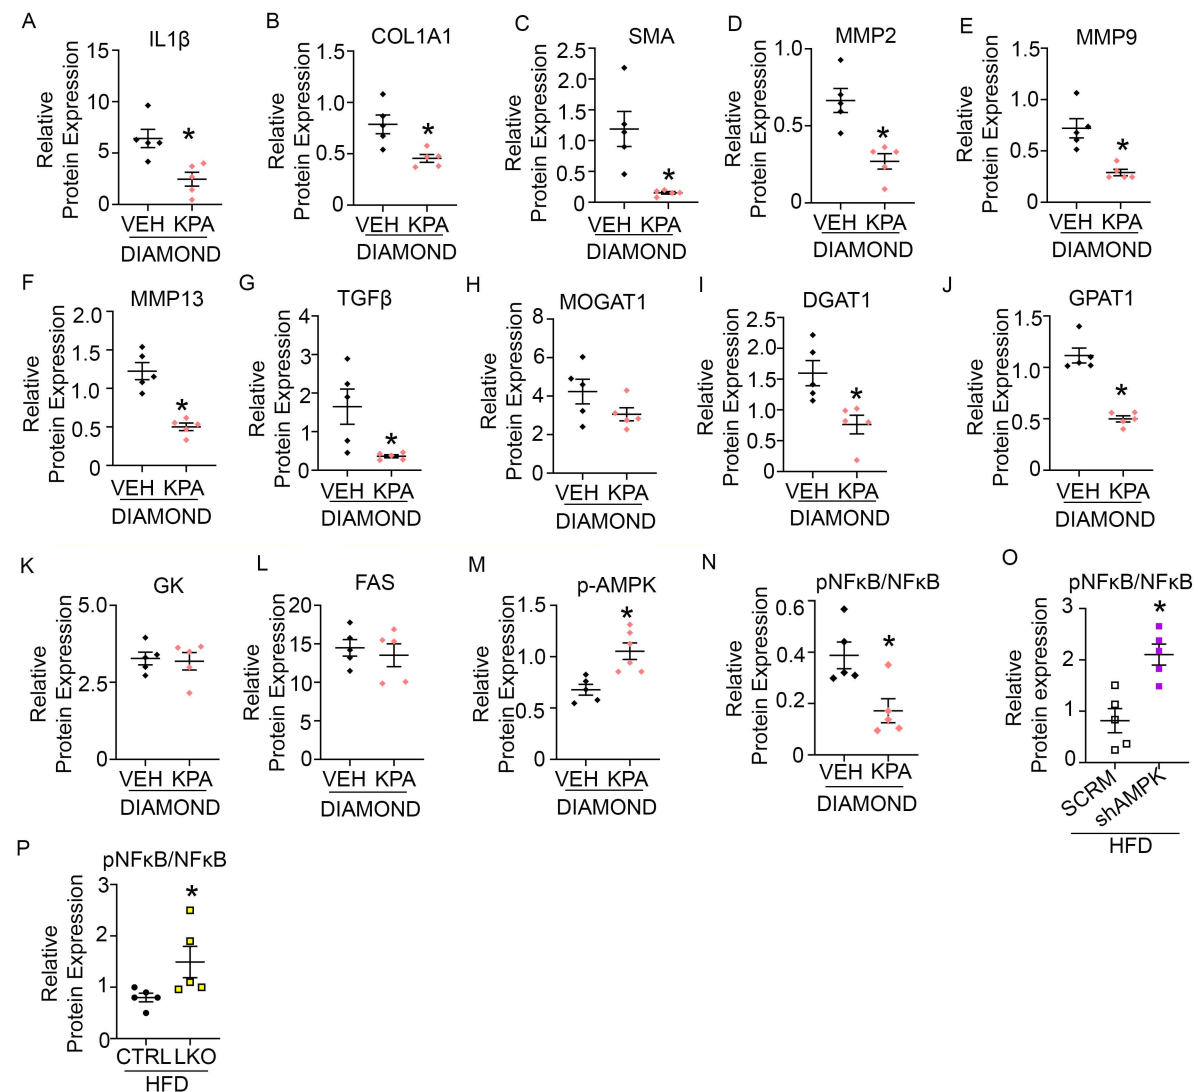

**Supplemental Figure 11.** Densitometric analysis of blots in Figure 8G (A-G) and Figure 9G (H-L), Figure 9H (M), Figure 9K (N), Figure 9L (O), Figure 9M (P) showing the expression of the indicated proteins. Mean  $\pm$  SEM shown. Student's unpaired t-test  $^* < 0.05$  versus respective controls.

**SUPPLEMENTAL FIGURE 12**

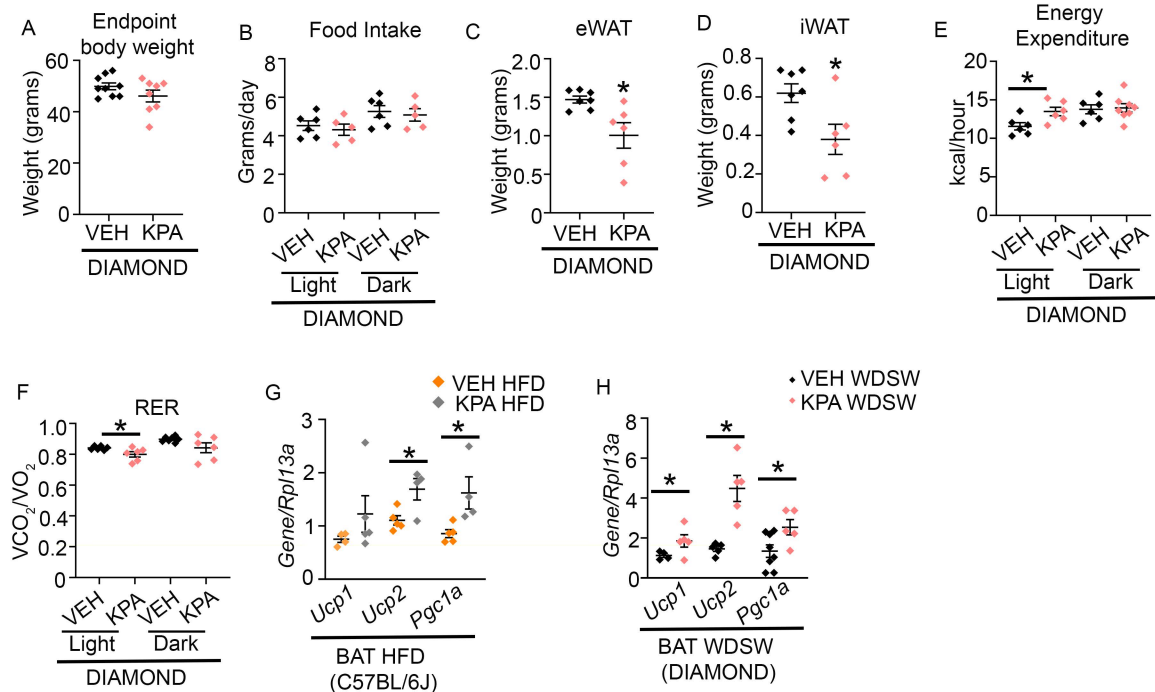

**Supplemental Figure 12.** (A) Endpoint bodyweight of DIAMOND mice on Western diet and sugar water (WDSW). (B) Daily food intake (averaged over 4 days), assessed by CLAMS. Weight of (C) epididymal white adipose tissue (eWAT) and (D) inguinal white adipose tissue (iWAT). CLAMS analysis displaying (E) energy expenditure and (F) respiratory exchange ratio (RER). (G, H) Expression of indicated genes by RT-qPCR in brown adipose tissue (BAT). Mean  $\pm$  SEM shown. Student's unpaired t-test \* $<0.05$  versus respective controls.



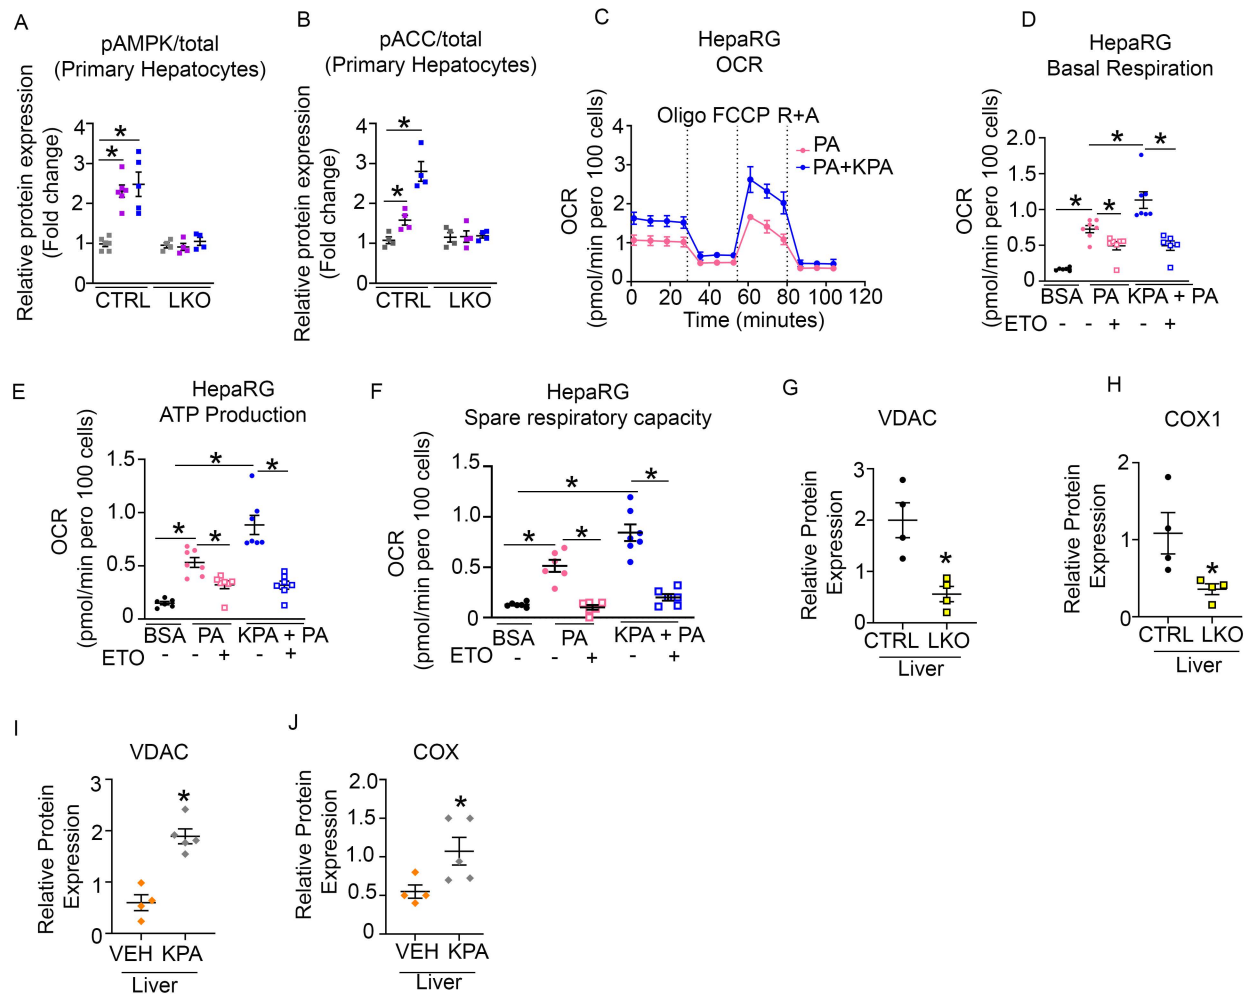

**Supplemental Figure 13.** (A-B) Densitometric analysis of blots from Figure 10E. (C) Seahorse traces of OCR in human hepatic HepaRG cells following sequential treatment with 1  $\mu$ M oligomycin (Oligo), 1  $\mu$ M FCCP and 0.5  $\mu$ M of rotenone and antimycin A (R+A), respectively. Cells treated with 100  $\mu$ M Palmitate or BSA in the presence or absence of KPA (3 nM). (D) Basal respiration, (E) ATP production and (F) spare respiratory capacity of cells. Densitometric analysis of Western blots in Figure 11E (G, H), and Western blots in Figure 11F (I, J). Mean  $\pm$  SEM shown. Student's unpaired t-test, or one-way ANOVA followed by Dunnett's post-hoc test; \*p < 0.05 compared to controls.
